# Supplementary material for: Cross-Platform Microarray Meta-Analysis for the Mouse Jejunum Selects Novel Reference Genes with Highly Uniform Levels of Expression
Source: PLoS One. 2013 May 9;8(5):e63125. doi: 10.1371/journal.pone.0063125 (PMC3650031; doi:10.1371/journal.pone.0063125)
Supplement: Table S3 — Microarray types contributed to the ranking of the top 100 RGs of jejunum-restricted meta-analysis I. (XLSX) [file pone.0063125.s003.xlsx]

## Sheet: Meta analysis 1
Table S3. Microarray types contributed to the ranking of the top 100 RGs of jejunum-restricted meta-analysis I.
Rank in meta-analysis	Gene	χ²	F	I	II	IIIa, b, c	IV	V	VI	VII	VIII	IX	RT-qPCR remark
1	Pcdha1 / Pcdha10 / Pcdha11 / Pcdha12 / Pcdha2 / Pcdha3 / Pcdha4 / Pcdha5 / Pcdha6 / Pcdha7 / Pcdha8 / Pcdha9 / Pcdhac1 / Pcdhac2	0.8371	0.8383				x		x	x	x
2	Duoxa1	0.7263	0.7292				x			x			expression was demonstrated, but primer pair needs to be re-designed due to primer dimerisation
3	Gag genes (withdrawn: 1200016E24Rik)	0.7068	0.709		x		x			x
4	Fcer2a	0.6467	0.6493				x		x	x	x	x
5	D15Ertd30e	0.603	0.6091				x		x	x	x
6	Tom1 / Gm5884	0.5823	0.5899				x		x	x	x
7	Adam26a	0.5823	0.5889				x			x			uncertain if expressed or not (similar Cq values and amplicon melting temperatures for target sequence, minus RT control and DNA-free control)
8	C78142	0.4003	0.4187				x		x	x	x		expressed at Cq > 35; PCR efficiency not determined
9	Cxx1b	0.3715	0.3856				x			x
10	C1qtnf5 / Mfrp	0.3443	0.3615				x		x	x		x	expression was demonstrated, but primer pair needs to be re-designed due to primer dimerisation
11	Zfa / Zfx	0.3404	0.3577				x		x	x	x	x
12	Tspan15	0.3216	0.3397				x		x	x
13	Igh / Igh-2 / Igh-VJ558	0.272	0.2921				x		x	x
14	Klra15	0.2701	0.288				x			x
15	Mrgpra4	0.2662	0.2848				x			x		x
16	Ints1	0.2651	0.2877				x		x	x
17	Zfp598	0.2649	0.2898				x		x	x	x	x
18	AA517841	0.2605	0.2875				x		x	x	x
19	Hjurp / 6430706D22Rik	0.2552	0.276				x		x	x	x
20	Ippk	0.2532	0.2763				x		x	x
21	2810449G22Rik	0.237	0.2653				x		x	x	x
22	Plekha7	0.1933	0.2234				x		x	x	x
23	E230006M18Rik	0.1869	0.2172				x		x	x	x
24	Cplx4	0.1848	0.2052				x			x
25	Vcan	0.1834	0.2138				x		x	x	x
26	Gm10817	0.1669	0.1877				x			x
27	Trhr2	0.1642	0.1856				x			x		x
28	AI314976	0.1496	0.1734				x		x	x
29	Ube2v1 / Gm8325	0.119	0.1429				x		x	x	x
30	Gemin8	0.1011	0.122				x			x
31	Gzme	0.1001	0.1308				x		x	x	x
32	C77815	0.0892	0.1193				x		x	x	x
33	Prl2b1	0.0884	0.1185				x		x	x	x
34	BC016548	0.086	0.1068				x			x		x
35	Krt14	0.0748	0.104				x		x	x	x
36	Zfyve19	0.0734	0.1001				x		x	x	x	x
37	Atp6v0d1	0.0721	0.0988				x		x	x	x	x
38	BC002189	0.0706	0.0904				x			x
39	Kcnj6	0.0683	0.0946				x		x	x	x	x
40	Slc5a4a	0.0648	0.0844				x			x		x
41	Krt34	0.061	0.0889				x		x	x	x
42	Siglece	0.0593	0.0783				x			x
43	Myh1	0.0591	0.0867				x		x	x	x
44	D13Ertd37e	0.0563	0.0836				x		x	x	x
45	Nanog	0.0542	0.0813				x		x	x	x
46	Grik3	0.0519	0.0703				x			x
47	Amdhd1	0.0463	0.0642				x			x
48	Tktl1	0.0457	0.0698				x		x	x	x	x
49	Nova1	0.0399	0.0569				x			x
50	Hadhb / Gm13910	0.0375	0.0565				x		x	x	x
51	Klk1b27	0.0338	0.0499				x			x
52	Slc52a3	0.0319	0.0501				x		x	x		x
53	Klrc3	0.0301	0.0456				x			x
54	Epdr1	0.0259	0.0438				x		x	x
55	Lrrc67	0.0249	0.0394				x			x
56	Uchl4	0.0244	0.0387				x			x
57	Krt15	0.0237	0.0441				x		x	x	x
58	Grap2	0.0233	0.0394				x		x	x	x
59	2310050C09Rik	0.0226	0.0365				x			x
60	C030018P15Rik	0.021	0.0403				x		x	x	x
61	Slc15a5	0.02	0.0332				x			x
62	Wfikkn1	0.0172	0.0297				x			x
63	Flywch1	0.0169	0.0319				x		x	x
64	Hoxd12	0.0164	0.0331				x		x	x	x	x
65	Magea5	0.0161	0.0284				x			x		x
66	Six4	0.0155	0.0307				x		x	x	x	x
67	Gsr	0.0126	0.0235				x			x
68	Spesp1	0.0123	0.0231				x			x
69	Dntt	0.0114	0.0247				x		x	x	x	x
70	Krtap16-1	0.0109	0.0211				x			x
71	Tmem14c	0.0108	0.0237				x		x	x	x	x
72	Trp63	0.0104	0.023				x		x	x	x	x
73	Muc10	0.0097	0.0232				x		x	x	x	x
74	Tmem121	0.0097	0.0194				x			x
75	Dcpp1	0.0091	0.0225				x		x	x	x
76	Phkg1	0.009	0.0224				x		x	x	x
77	Calb1	0.0066	0.0167				x		x	x	x	x
78	Prss28	0.0061	0.0139				x			x
79	Stx1b1 / Stx1b2	0.0059	0.0148				x		x	x	x
80	Tbc1d10a	0.005	0.0151				x		x	x	x
81	Acot5	0.0046	0.0114				x			x
82	Trim69	0.0044	0.0125				x		x	x
83	Fbln1	0.0038	0.0115				x		x	x	x	x
84	Zcchc17	0.0035	0.0095				x			x
85	Scn9a	0.0035	0.0104				x		x	x
86	B3gnt3	0.0034	0.0096				x		x	x		x
87	Nfe2l1	0.0034	0.0107				x		x	x	x	x
88	Vps72	0.0034	0.0117				x		x	x	x
89	Casp6	0.0031	0.01				x		x	x	x	x
90	Tg	0.0031	0.0111				x		x	x	x
91	Hist1h3d	0.0023	0.0072				x			x
92	Tbc1d20	0.002	0.0083				x		x	x	x
93	Vars	0.002	0.0084				x		x	x	x
94	C80360	0.0019	0.0082				x		x	x	x
95	Nobox	0.0019	0.008				x		x	x	x
96	AA517858	0.0017	0.0076				x		x	x	x
97	Gne	0.0012	0.0054				x		x	x	x	x
98	Naa11	0.001	0.0056				x		x	x	x
99	P2rx4	0.0009	0.0045				x		x	x	x	x
100	Idh2	0.0009	0.0044				x		x	x	x	x
genes in bold: analysed by RT-qPCR
χ²: probability of Chi squared test, F: probability of F test statistics
genes in dark brown: low expression in combination with primer dimerisation which would require re-design of the primer pair used (primers used: ACCAAGCCAACCTTTCCAATG and GCCCCGATGAATAAGCTGGTC for Duoxa1, and GGCGGGAGACCGGGACTA and CCGGCTCTCGGATCGCT for C1qtnf5 / Mfrp)
gene in light blue: uncertain expression with primers CCTGAGGTCCTGCCTCTAGTATGAT and GGTGTCCCAGTCCTCACTTTGT for Adam26a
genes in light brown: very low expression with primer pair CTGTCACTCATCAATTAGGAAAGACTGT and GTAACCCTAGTCTTGAAAAGGCAGAT for the gene C78142
microarray types in light grey: no contribution to the top 100 gene list
Microarray types: I, Mouse Genome 430 2.0 Array (Affymetrix); II, IncyteMouseGEM1 (non commercial); IIIa, 20K Riken cDNA array; IIIb, Spotted Riken cDNA array 20-40K; IIIc, Spotted Riken cDNA array 40-60K; IV, Mouse Genome 430A Array (Affymetrix); V, NTU_CGM_MCF Mouse 6.1k Microarray (non-commercial); VI, MG-U74A,B,C (Affymetrix); VII, Mouse Genome 430 2.0 Array (Affymetrix); VIII, MG-U74Av2 (Aff…
